# Supplementary material for: Photoacoustic studies of energy transfer from ozone photoproducts to bath gases following Chappuis band photoexcitation
Source: Royal Society of Chemistry journal article supplement (doi:10.1039/d0cp05056c), 2020-12-10
Supplement: d0cp05056c1.pdf [file d0cp05056c1.pdf]

## Supplementary Information for “Photoacoustic Studies of Energy Transfer from Ozone Photoproducts to Bath Gases following Chappuis Band Photoexcitation”

Michael I. Cotterell,<sup>1\*</sup> Kate Szpek,<sup>2</sup> David A. Tiddeman,<sup>2</sup> Jim M. Haywood<sup>2,3</sup> and Justin M. Langridge<sup>2</sup>

<sup>1</sup>School of Chemistry, University of Bristol, Bristol, UK, BS8 1TS

<sup>2</sup>Observation Based Research, Met Office, Exeter, UK, EX1 3PB

<sup>3</sup>College for Engineering, Mathematics and Physical Sciences, University of Exeter, Exeter, UK,

EX4 4QF

\* Author for correspondence: m.cotterell@bristol.ac.uk

### Contents

|     |                                                                                             |    |
|-----|---------------------------------------------------------------------------------------------|----|
| S1. | Pressure Dependent Processes during Photoacoustic Transduction .....                        | 2  |
| S2. | Measurements of static sample pressure .....                                                | 4  |
| S3. | Measurements of phase shift.....                                                            | 5  |
| S4. | Photoacoustic measurements for the detection of O <sub>3</sub> at visible wavelengths ..... | 14 |
| S5. | References.....                                                                             | 16 |

## S1. Pressure Dependent Processes during Photoacoustic Transduction

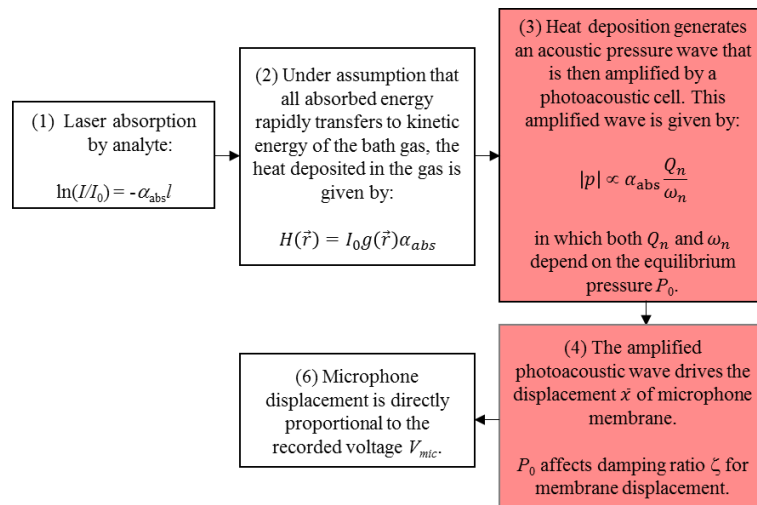

Figure S 1-1. The photoacoustic transduction process from laser light absorption by an analyte through to the recording of a microphone voltage response. Pressure dependent processes are highlighted in red text.

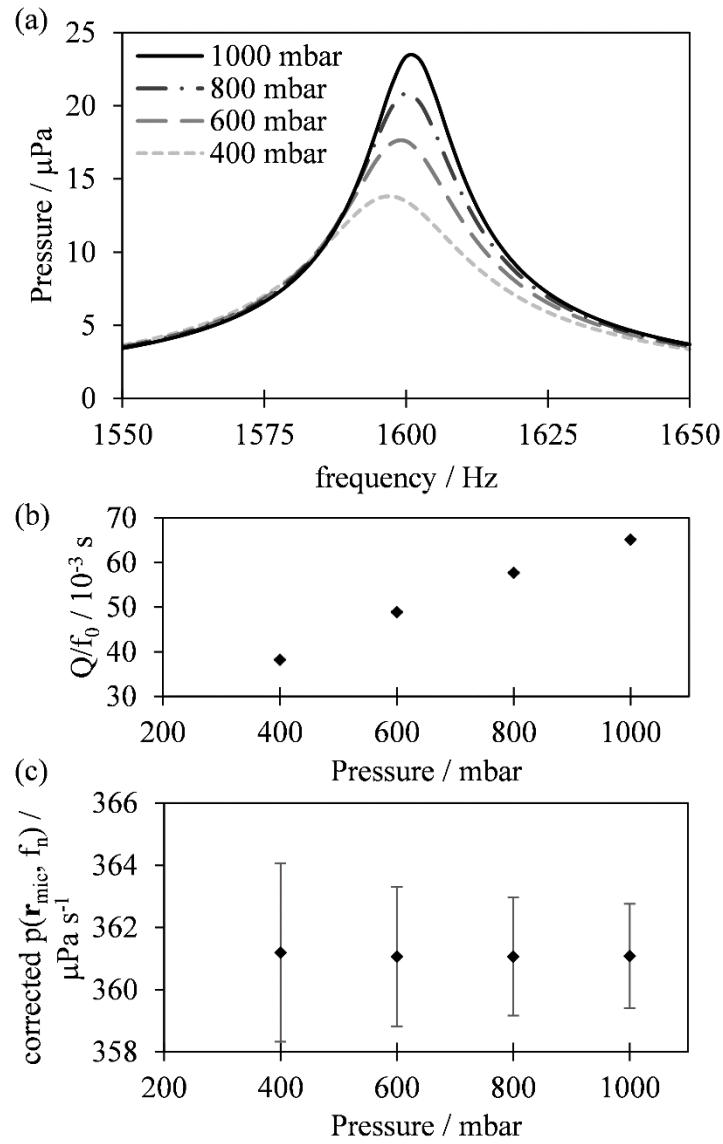

Figure S 1-2. (a) FEM model predictions of the frequency-dependent photoacoustic pressure amplitude at the microphone location  $|p|$  with variation in the static pressure  $P_0$  over the range 400 – 1000 mbar. (b) and (c) show the variations in the cell time constant and the normalised photoacoustic signal ( $|p|/(Q_n/\omega_n)$ ), respectively, with  $P_0$ .

## S2. Measurements of static sample pressure

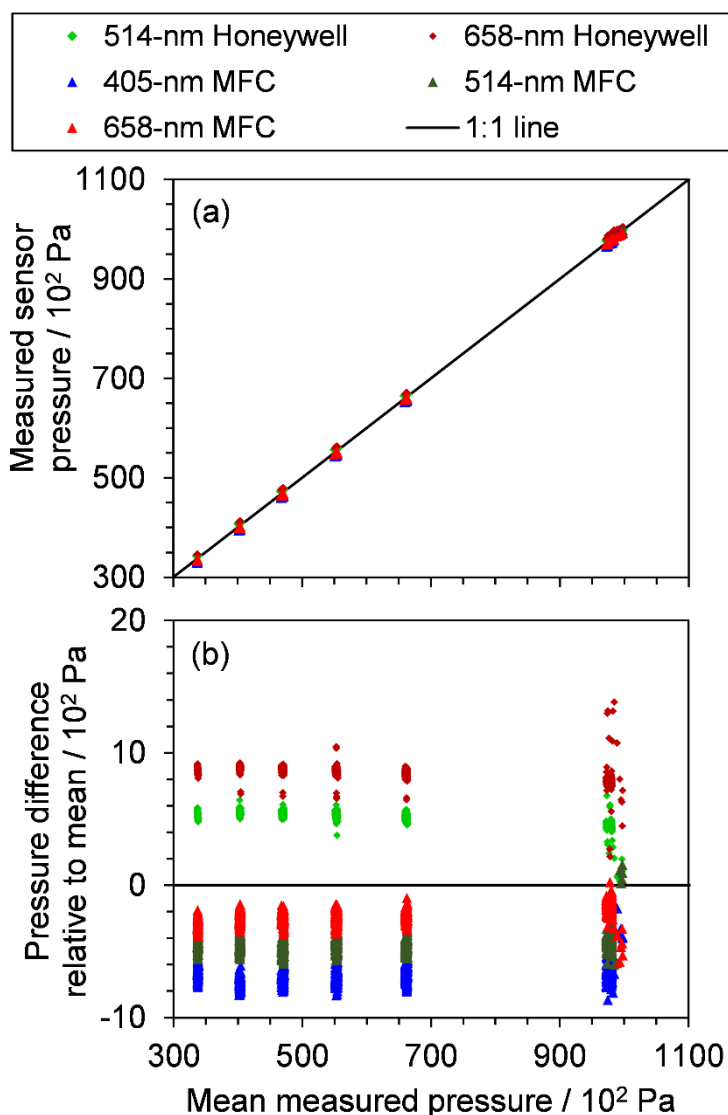

Figure S 2-1. (a) Measurements of the static sample pressure from five separate pressure sensors integrated into our CRDS-PAS instrumentation as a function of the mean measured pressure from all five sensors. These sensors include three mass flow controllers that regulate the sample flow that is drawn through each spectroscopy flow line (labelled as ‘MFC’ in the figure legend), and two precision pressure transducers (Honeywell PPT-Series) that are located immediately after the 514 and 658-nm PAS instruments. (b) The difference in pressure recorded by each pressure sensor from the mean measured pressure from all five sensors, as a function of the mean measured pressure. The reduced pressure readings by the MFC sensors compared to those recorded by the Honeywell sensors are clearly shown; each MFC is located downstream of a HEPA filter that acts to impede the sample volumetric flow and thus causes a pressure drop downstream of the filter.

### S3. Measurements of phase shift

The output power from the laser (Toptica, iBeam Smart) for the PAS spectrometer was modulated at a frequency  $f_{mod}$ , with  $f_{mod}$  the nearest integer value to the measured cell resonance frequency  $f_n$ , as determined by speaker-excitation measurements (see main text). The laser powers were modulated by supplying a sinusoidal waveform with a 0 – 5 V DC peak-to-peak range to the analogue modulation terminal of each laser (referred to as the *laser modulation signal*). These waveforms directly control the laser power, with a maximum modulation frequency of 1 MHz. The modulation waveform is generated by a Field Programmable Gate Array (FPGA) card (National Instruments, PXI-7842R Virtex-5 LX50). The differential-amplified microphone response from the PAS spectrometer is acquired on the same FPGA card. Figure S 3-1 is a schematic to illustrate the waveforms for the laser modulation signal and the recorded microphone response. The microphone waveform has the same frequency as that of the modulation signal but is shifted in phase to later times. We examine the sources of this phase shift later in this section.

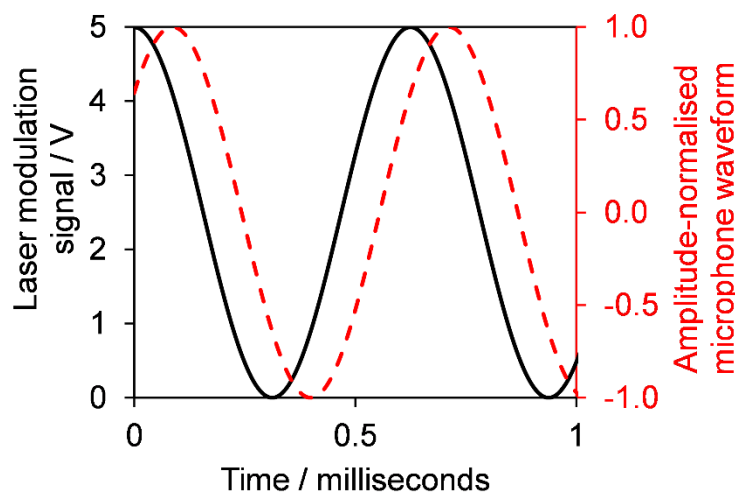

Figure S 3-1. Illustrative schematic to depict the phase shift in the recorded microphone waveform with respect to the laser modulation signal that is supplied to the analogue input to the PAS excitation laser.

The phase for each waveform is calculated in real time on the FPGA from the phase angle between the real and imaginary components of the FFTs for each waveform. These two phases are subtracted to give the raw phase shift,  $\theta_{raw}$ . Figure S 3-2 shows variation in  $\theta_{raw}$  during a single calibration; at the beginning of the calibration, a background phase is recorded corresponding to the PAS cell devoid of any light absorbing sample (red highlighted region at early times), before ozone-laden gas is introduced into the PAS cell and the concentration of ozone is then reduced in steps over time (yellow highlighted regions). The absence of  $\theta_{raw}$  measurements between ozone concentrations arises because, prior to measurements of the background response and those at each ozone concentration, the acoustic amplification characteristics of the PAS cell ( $Q_n$ ,  $f_n$ ,  $S_{spk}$ ) are measured by firing the speaker. During these speaker-

excitation measurements,  $\theta_{raw}$  is not defined as the lasers are not providing excitation of the resonant mode during this time.

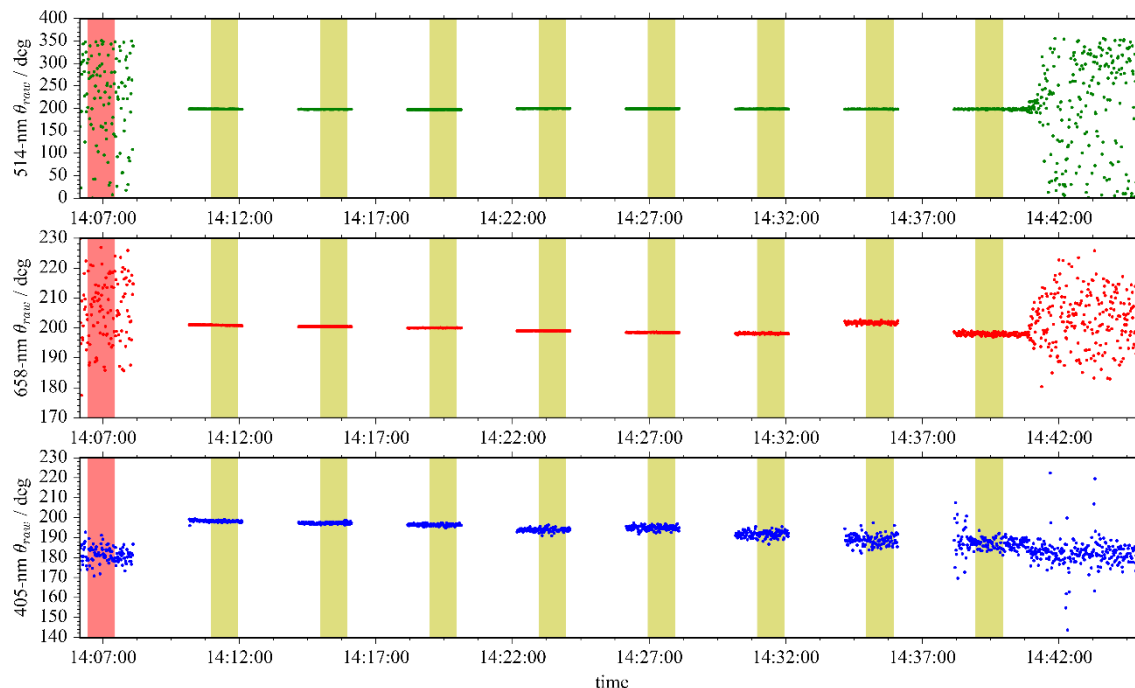

Figure S 3-2. The measured variation in  $\theta_{raw}$  for each of our three PAS spectrometers during a single ozone calibration. At the beginning of the calibration (red rectangles), a background phase shift measurement is made for 30 s. Then, ozone-laden gas is introduced into the cell and is stepped to progressively lower concentration levels over time. At each of the eight ozone concentration levels supplied during a single calibration, the phase shift is measured for 30 s (yellow rectangles). This data set corresponds to measurements in a bath gas composition  $x_{O_2} = 1.0$  and  $P_0 = 304.1$  hPa.

During these calibrations, the resonance frequency changes with the ozone concentration. This change in  $f_n$  (in addition to  $Q_n$  and  $S_{spk}$ , see main text) is measured by exciting the cell with a speaker transducer. The determined  $f_n$  is used by a computer-controlled feedback to adjust the laser modulation frequency. However, our digitised output waveform for the laser modulation used a rounded (nearest integer) value for this frequency. This causes up to a 0.5 Hz discrepancy between the frequencies of the eigenmode resonances and that of the laser power modulation. Although this discrepancy may seem small, we show below that these differences in frequency cause significant changes in the measured phase shift. During calibrations, we record both the  $f_n$  (to a precision of eight decimal places) and the laser modulation frequency  $f_{mod}$ , and we use these frequencies to correct  $\theta_{raw}$  during post-processing using the following treatment.

The frequency dependence of the excitation of the pressure eigenmode of the PAS cell is described by the equation (Cotterell et al., 2019b, 2019a; Miklós et al., 2001):

$$p(\vec{r}_M, \omega) = \sum_n \frac{i\omega}{\left(\omega_n^2 - \omega^2 + i\frac{\omega\omega_n}{Q_n}\right)} \frac{(\sigma - 1)I_0 \int g(\vec{r})\alpha_{abs}(\vec{r})p_n(\vec{r})dV}{V} p_n(\vec{r}_M)$$

in which  $\omega_n$  is the angular frequency for the cell eigenmode ( $\omega_n = 2\pi f_n$ ) and  $\omega$  is the angular frequency at which the cell is being excited (in our case,  $\omega = 2\pi f_{mod}$ ). For single mode excitation, the amplitude-normalised mode excitation distribution with frequency is described by a Lorentzian-like distribution of the form:

$$p(\vec{r}_M, \omega) = p_0 \frac{i\omega}{\left(\omega_n^2 - \omega^2 + i\frac{\omega\omega_n}{Q_n}\right)} \quad \text{Eqn. S 3-1}$$

in which  $p_0$  is the distribution amplitude and is associated with the overlap integral  $J_n$  ( $J_n = \int g(\vec{r})\alpha_{abs}(\vec{r})p_n(\vec{r})dV$ ), eigenmode pressure at the microphone location ( $p_n(\vec{r}_M)$ ), adiabatic coefficient ( $\sigma$ ), laser intensity ( $I_0$ ) and PAS cell volume ( $V$ ). We calculate the additional phase shift ( $\theta_L$ ) introduced from the frequency mismatch between  $f_{res}$  and  $f_{mod}$  by inserting the measured  $f_n$ ,  $Q_n$  and recorded  $f_{mod}$  into the Lorentzian distribution above (Eqn. S 3-1), and calculating the phase angle from the ratio of the imaginary and real components of  $p(\vec{r}_M, \omega)$ . We denote this added phase shift  $\theta_L$ . Figure S 3-3 shows the amplitude  $|p(\vec{r}_M, \omega)|$  of the distribution in Eqn. S 3-1 as a function of modulation frequency  $f = \omega/(2\pi)$ , in addition to the calculated phase shift  $\theta_L$ , for typical  $f_n$  and  $Q_n$  of 1600 Hz and 90 respectively for our PAS cells. This figure demonstrates that a mismatch in the modulation frequency of  $\pm 0.5$  Hz with respect to the cell resonance frequency leads to errors in the recorded phase shift of up to  $\theta_L \sim \pm 4^\circ$ .

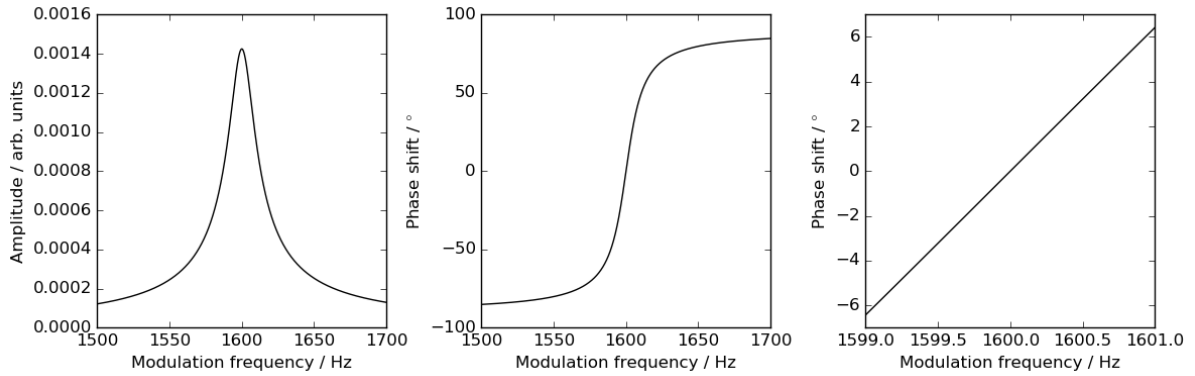

Figure S 3-3. Plots of the predicted amplitude and phase shift  $\theta_L$  as a function of laser modulation frequency from Eqn. S 3-1 for a PAS cell with  $f_n = 1600$  Hz and  $Q_n = 90$ .

Figure S 3-4 shows the predicted variation in  $\theta_L$  for the data shown in Figure S 3-2. Variations in  $\theta_L$  of approximately  $\pm 2^\circ$  are expected for this particular data set.

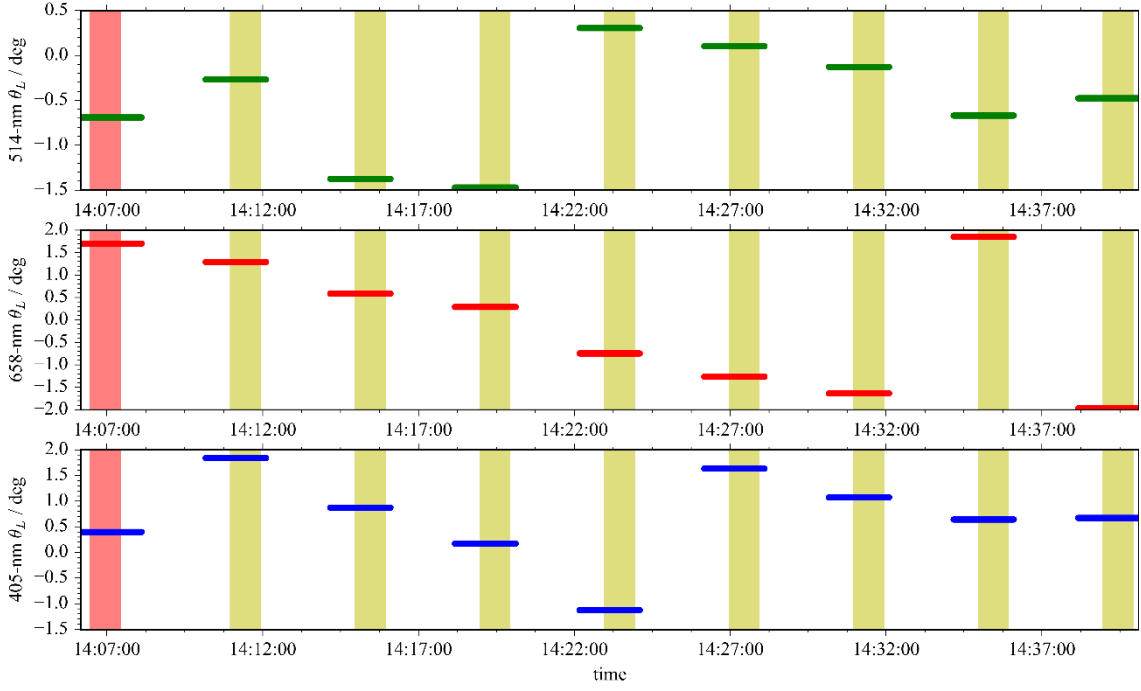

Figure S 3-4. For the same measurement data set presented in Figure S 3-2, this figure shows the predicted phase shift  $\theta_L$  introduced by the mismatch between the PAS cell resonance frequency ( $f_n$ ) and the modulation waveform used to drive the sinusoidal oscillation in the PAS cell laser power ( $f_{mod}$ ).

We then subtract  $\theta_L$  from  $\theta_{raw}$  to give a corrected phase shift  $\theta_{cor}$ . Figure S 3-5 shows the variation in  $\theta_{cor}$  for the same calibration data set discussed above. Figure S 3-5 shows that the noise in  $\theta_{cor}$  is higher when the ozone concentration is lower (i.e. at later times). For low sample absorption coefficients, the acoustic response at the microphone is low and the microphone signal is dominated by ambient acoustic noise, background contributions from laser-window interactions and electronic/microphone noise. To understand the measured variation in  $\theta_{cor}$ , we can write this phase shift as a sum of both a constant instrument phase shift  $\theta_{inst}$  (we will describe this contribution later in this section) and that from the photoacoustic wave driving a microphone response  $\theta_{PA}$ :

$$\theta_{cor} = \theta_{inst} + \theta_{PA}$$

The phase  $\theta_{PA}$  arises from two sources; the photoacoustic signal of interest from photoexcitation of ozone (with associated signal amplitude  $S_{sample}$ ), and that from laser absorption by the windows of the PAS cell (with associated signal amplitude  $S_{bkg}$ ). We can write the phase shift  $\theta_{PA}$  as a sum of phases for the background and sample contributors weighted by their respective signal amplitudes:

$$\theta_{cor} = \theta_{inst} + \frac{S_{bkg}\theta_{bkg} + S_{sample}\theta_{sample}}{S_{bkg} + S_{sample}}$$

In the limit  $S_{bkg} \ll S_{sample}$  and  $S_{bkg}\theta_{bkg} \ll S_{sample}\theta_{sample}$ :



$$\theta_{cor,max} = \theta_{inst} + \theta_{sample}$$

Therefore, in the limit of a strong PAS signal from O<sub>3</sub> absorption, the observed phase is independent of the background absorption from the PAS cell windows. For the same calibration set discussed above, Figure S 3-6 plots the measured phase with variation in the measured absorption coefficient for the ozone-laden sample; we note that the absorption cross section at  $\lambda = 405$  nm is much lower than at the longer 514 and 658 nm wavelengths, resulting in a lower measured absorption at our shortest spectroscopy wavelength. This figure shows that, in the limit of large absorption (approximately for when  $S_{sample}/S_{bkg} > 10$ ), the phase shift tends to a plateau at which the microphone signal is dominated by the sum of phases  $\theta_{inst} + \theta_{sample}$ .

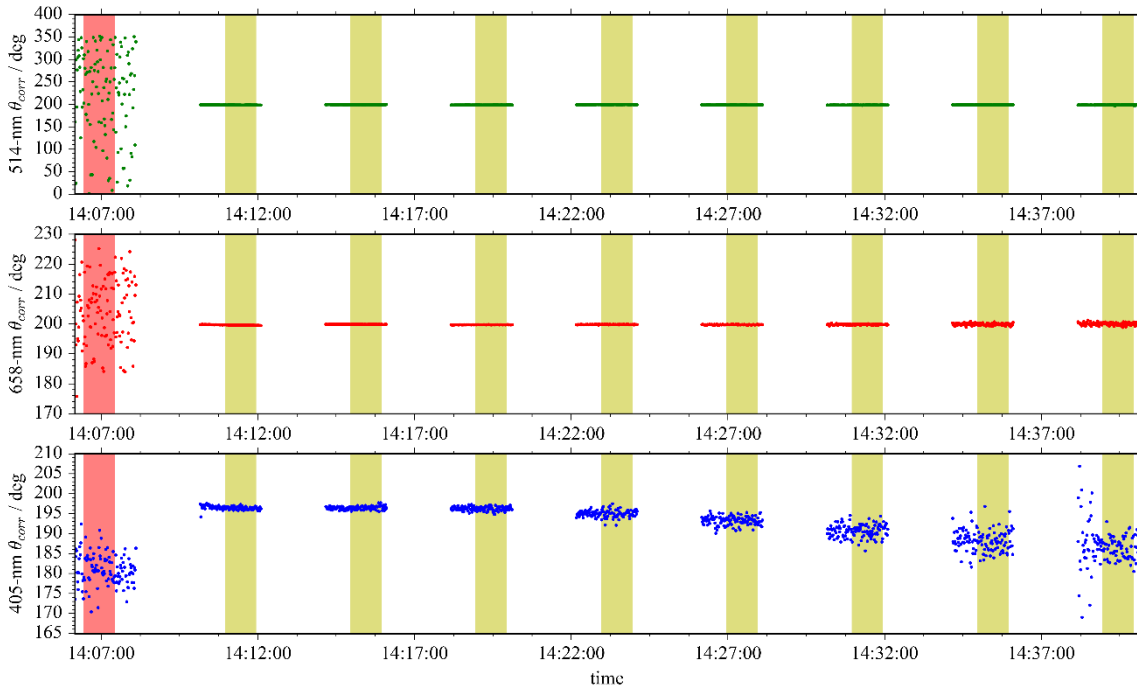

Figure S 3-5. For the same measurement data set presented in Figure S 3-2 and Figure S 3-4, this figure plots the corrected phase shift  $\theta_{cor}$ .

Figure S 3-7 shows the variation in  $\theta_{cor,max}$  for all our calibration data sets described in the main text, with  $\theta_{cor,max}$  plotted as a function of the static pressure  $P_0$  and different data series corresponding to the bath gas O<sub>2</sub> mass fraction ( $x_{O_2}$ ). The data shows clear trends in the phase shift with both pressure and  $x_{O_2}$ , although there is a large systematic offset corresponding to the instrument phase shift  $\theta_{inst}$ . The instrument phase shift arises from numerous sources. Kosterev et al., (2006) discuss sources of instrument phase shift in photoacoustic measurements. Sources relevant to our measurements include any delay in the response of the laser output power to the input analogue modulation waveform, phase

shift in the microphone response (e.g. a  $90^\circ$  phase shift could be envisaged if the microphone displacement is treated as an undamped simple harmonic oscillator), and delay in the microphone response waveform introduced by our differential amplification processing electronics prior to the FPGA data acquisition.

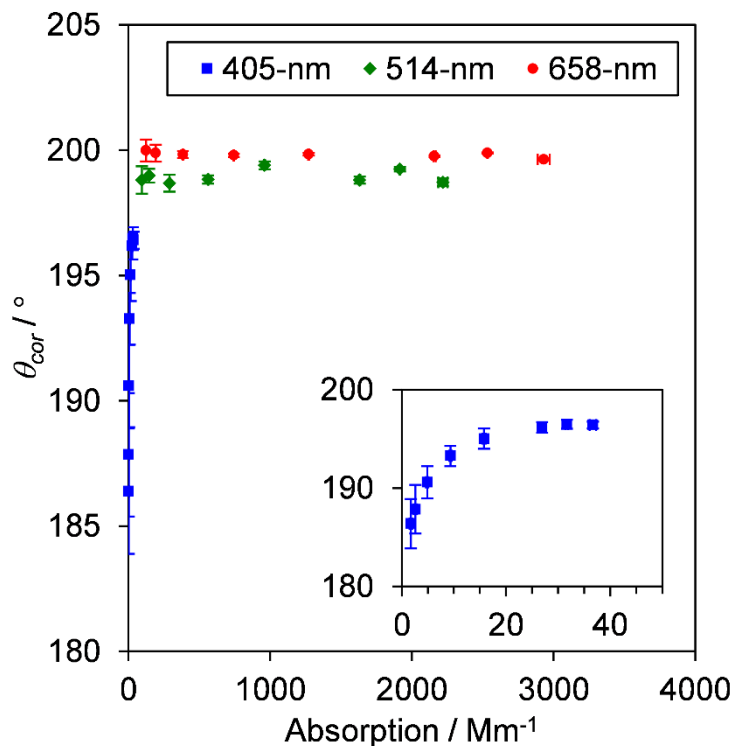

Figure S 3-6. The corrected phase shift  $\theta_{cor}$  as a function of the measured absorption coefficient at each  $O_3$  concentration level for the same measurement data set presented in Figure S 3-2, Figure S 3-4 and Figure S 3-5. The inset shows an expanded portion of the data set for measurements made by the 405-nm PAS instrument to highlight the tendency of  $\theta_{cor}$  to trend towards a plateau for sample absorption values  $> 20 \text{ Mm}^{-1}$ .

To characterise  $\theta_{inst}$ , we used a non-volatile aerosol sample with a sub-micrometre diameter; in the main text, we discuss that such an aerosol sample will not have a sample phase shift ( $\theta_{sample}$ ). Importantly, with a strong light absorbing sample, the microphone signal will be dominated by the contribution from the aerosol photoacoustic signal rather than the background arising from window heating. In this case, the measured  $\theta_{cor}$  corresponds to  $\theta_{inst}$ . Here, we used the same aerosol data set measurements described in Sect. 3.2 of the main text. Specifically, we examine here the measured phase shift when we passed monodisperse (250 nm diameter) dyed PSL aerosol through our PAS spectrometers. For these measurements, the absorption coefficient for the PSL sample ranged from 30 to  $125 \text{ Mm}^{-1}$  for measurements made across all the PAS spectrometers and over all  $P_0$ . Figure S 3-8 shows the measured  $\theta_{cor}$  for our PSL measurements at six different values of static pressure over the range 330 – 1000 hPa. The  $\theta_{cor}$  values are invariant with pressure and are the same for each

spectrometer within measurement uncertainty;  $\theta_{inst}$  thus takes values of  $190.6 \pm 0.5^\circ$ ,  $189.5 \pm 0.8^\circ$  and  $190.6 \pm 0.4^\circ$  for the 405-nm, 514-nm and 658-nm spectrometers respectively.

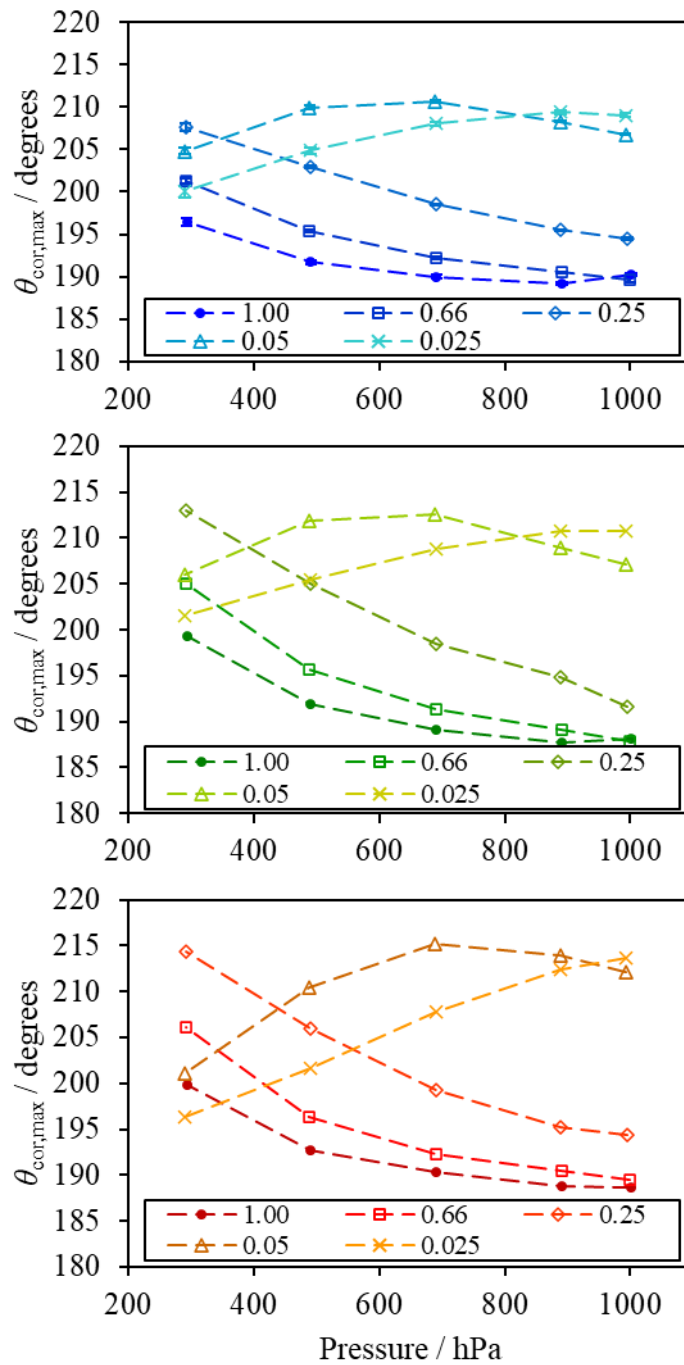

Figure S 3-7. The variation in  $\theta_{cor,max}$  for all calibrations performed with the static pressure  $P_0$ . Different data series correspond to the different values of bath gas  $x_{O_2}$ . The top plot corresponds to measurements made at the 405 nm wavelength, the middle plot to measurements at 514 nm, and the bottom plot to measurements at 658 nm.

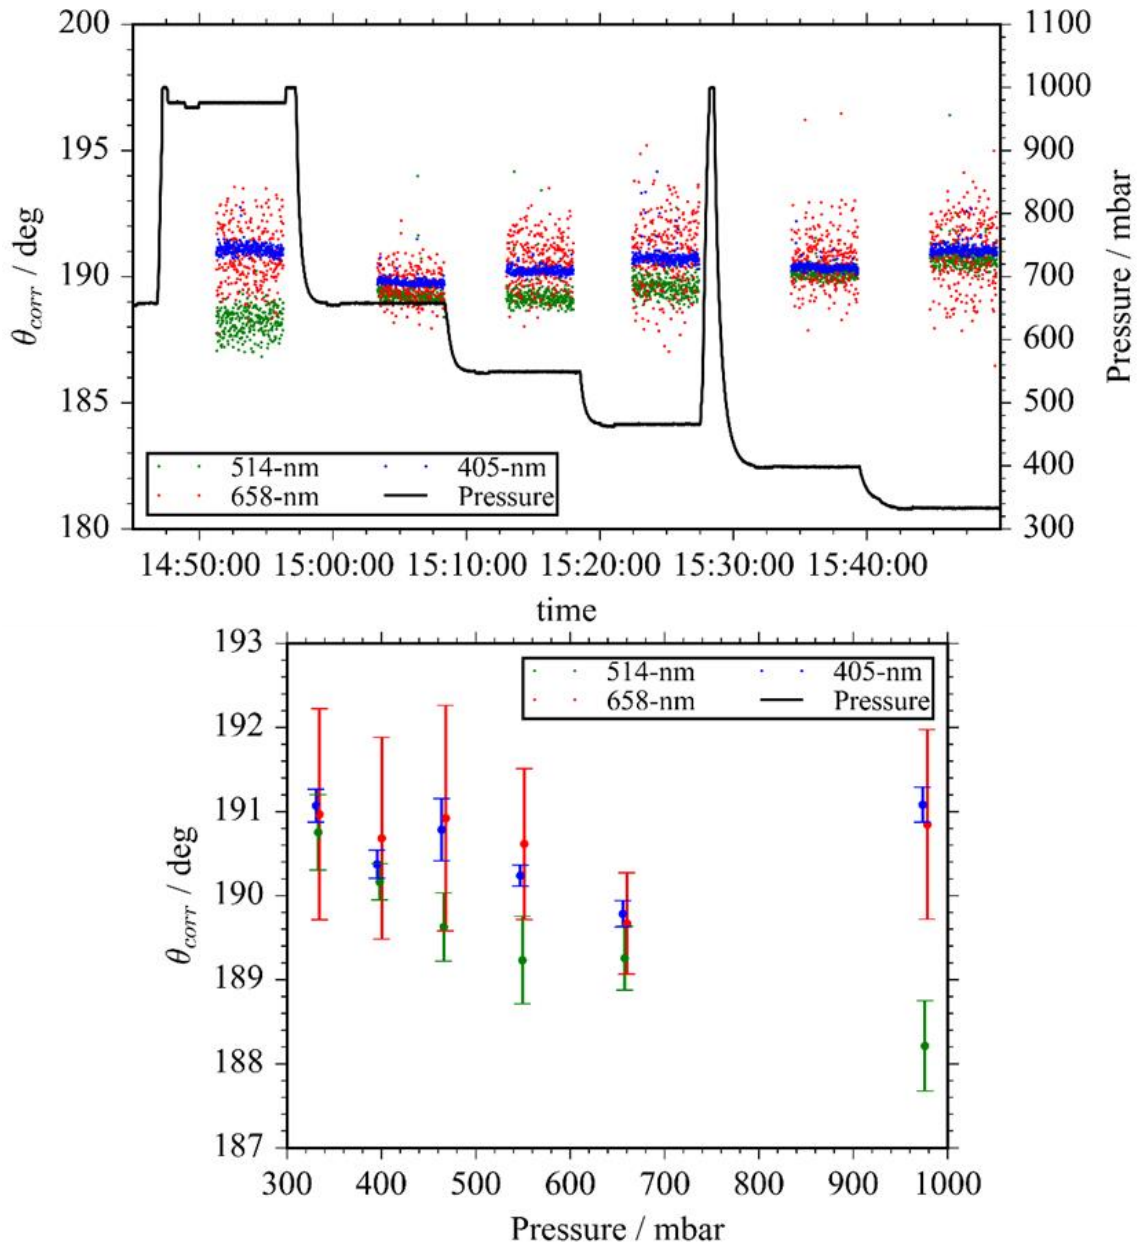

Figure S 3-8. (a) For measurements using each of our three PAS instruments, the measured  $\theta_{cor}$  for 250 nm diameter dyed PSL spheres over time, with the pressure stepped to six different pressure levels over the duration of our measurements over the  $P_0$  range 330 - 1000 hPa. At each pressure level, the phase shift was recorded for 5 minutes. (b) The mean  $\theta_{cor}$  vs pressure for the same data as in (a).

Finally, the values for  $\theta_{inst}$  for each PAS instrument, determined from our aerosol measurements, are subtracted from  $\theta_{cor,max}$  for our ozone measurements to give  $\theta_{sample}$ . Figure S 3-9 shows our measured variations in  $\theta_{sample}$  with  $P_0$  and  $x_{O_2}$ . These measured variations are discussed and modelled in the main text, in which  $\theta_{sample}$  is referred to simply as the *phase shift*.

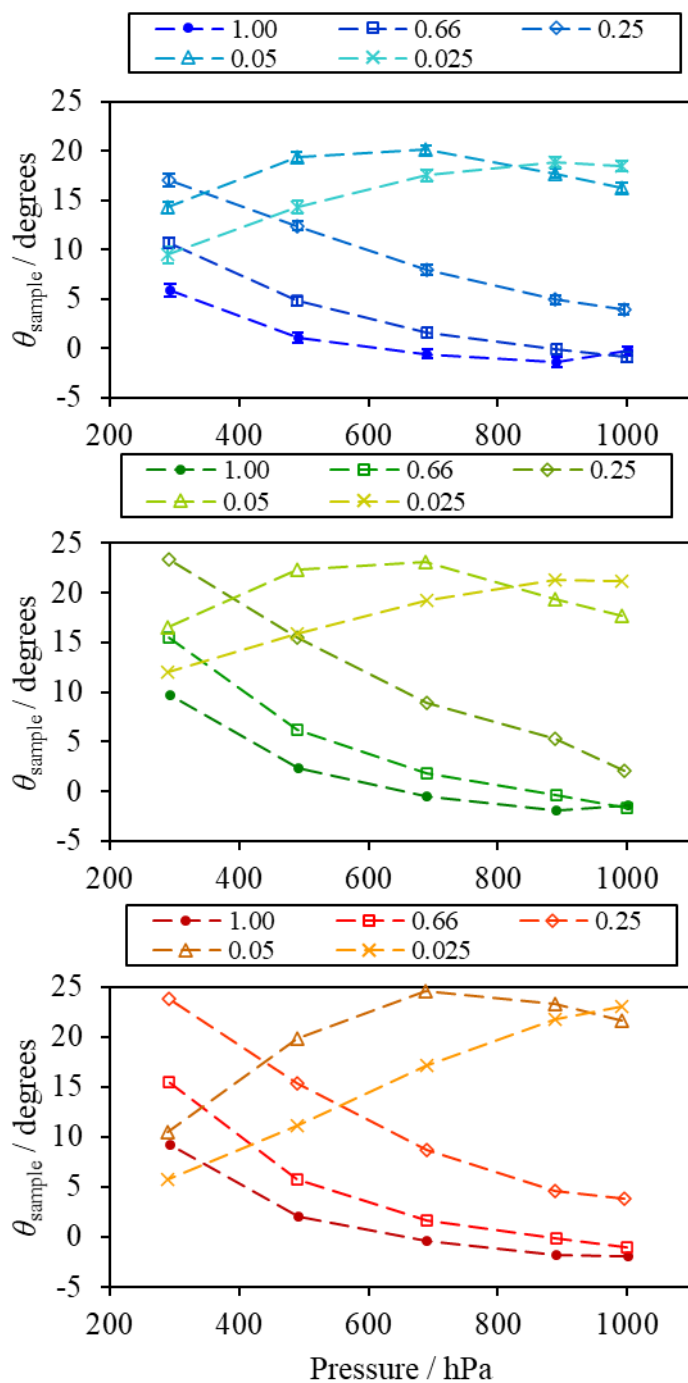

Figure S 3-9. The variation in  $\theta_{sample}$  for all calibrations performed with the static pressure  $P_0$ . Different data series correspond to the different values of bath gas  $x_{O_2}$ . The top plot corresponds to measurements made at the 405 nm wavelength, the middle plot to measurements at 514 nm, and the bottom plot to measurements at 658 nm.

#### S4. Photoacoustic measurements for the detection of O<sub>3</sub> at visible wavelengths

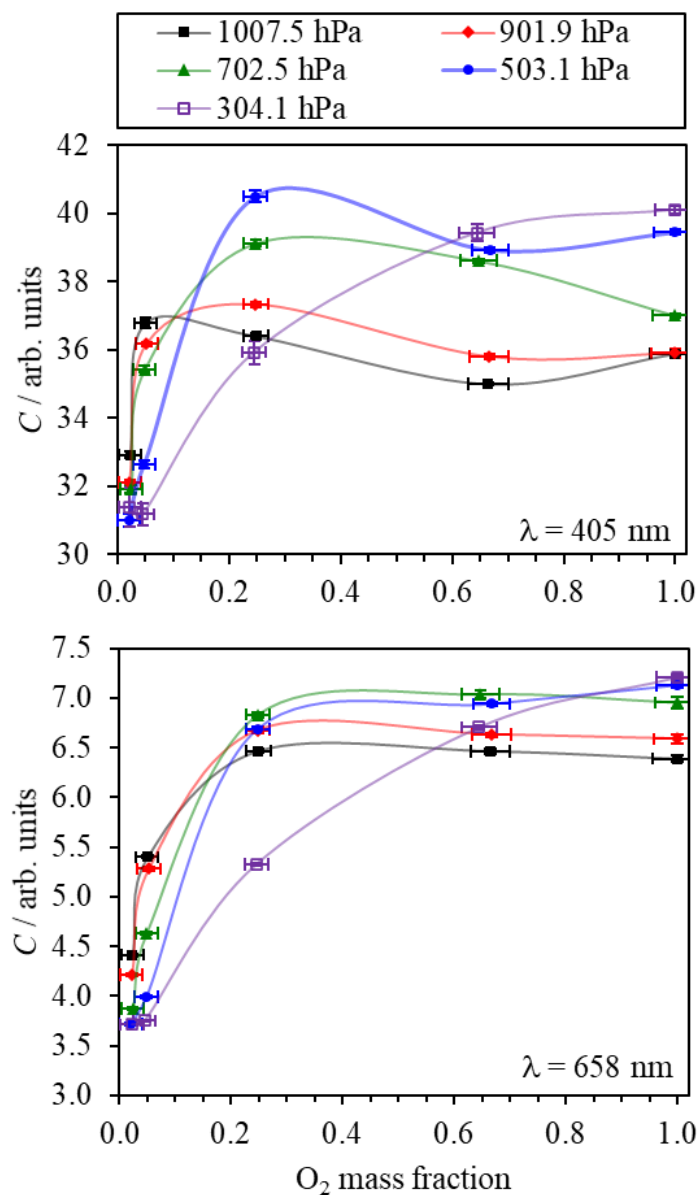

Figure S 4-1. The variation in the PAS sensitivity  $C$  (prior to any correction for microphone response function) with O<sub>2</sub> mass fraction for different static pressure levels. Measurements are shown for the 405-nm and 658-nm spectrometers. Lines are to guide the eye only.

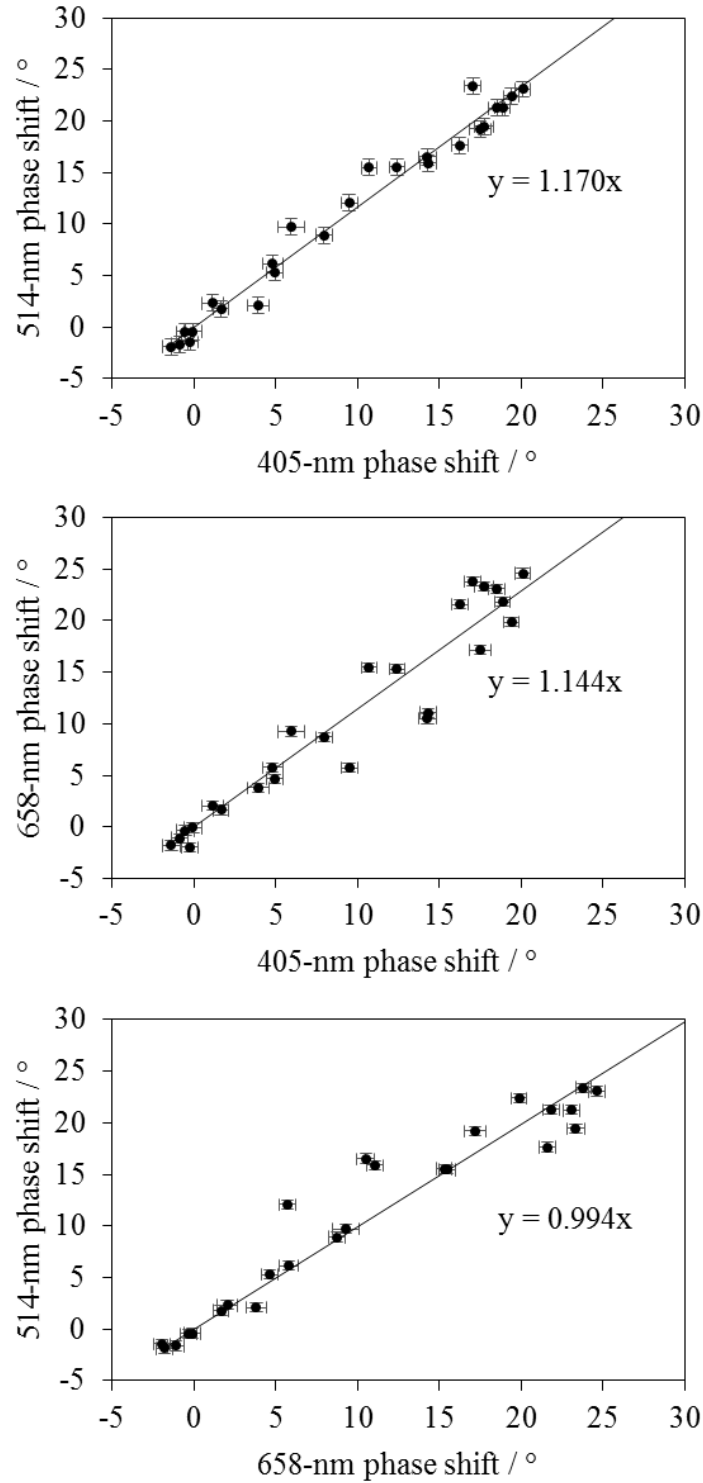

Figure S 4-2. Comparison of the measured photoacoustic phase shift from each spectrometer for corresponding values of  $P_0$  and  $O_2$  mass fraction. The solid line represents a least-squared fit of a straight line constrained through the origin, with the slope indicated on each plot. These slopes indicate that the phase shifts are near-identical for the 514 and 658-nm measurements, while the 405-nm measurements exhibit a reduced phase shift by ~13 – 15%.

## S5. References

Cotterell, M. I., Ward, G. P., Hibbins, A. P., Haywood, J. M., Wilson, A. and Langridge, J. M.: Optimizing the performance of aerosol photoacoustic cells using a finite element model. Part 1: Method validation and application to single-resonator multipass cells, *Aerosol Sci. Technol.*, 53(10), 1107–1127, doi:10.1080/02786826.2019.1650161, 2019a.

Cotterell, M. I., Ward, G. P., Hibbins, A. P., Wilson, A., Haywood, J. M. and Langridge, J. M.: Optimizing the performance of aerosol photoacoustic cells using a finite element model. Part 2: Application to a two-resonator cell, *Aerosol Sci. Technol.*, 53(10), 1128–1148, doi:10.1080/02786826.2019.1648749, 2019b.

Kosterev, A. A., Mosely, T. S. and Tittel, F. K.: Impact of humidity on quartz-enhanced photoacoustic spectroscopy based detection of HCN, *Appl. Phys. B Lasers Opt.*, 85(2–3), 295–300, doi:10.1007/s00340-006-2355-2, 2006.

Miklós, A., Hess, P. and Bozóki, Z.: Application of acoustic resonators in photoacoustic trace gas analysis and metrology, *Rev. Sci. Instrum.*, 72(4), 1937–1955, doi:10.1063/1.1353198, 2001.
